# Supplementary material for: Long PEO-based nanoribbons generated in a polystyrene matrix through reaction-induced microphase separation followed by a fast crystallization process
Source: Royal Society of Chemistry journal article supplement (doi:10.1039/d0sm02058c), 2021-01-01
Supplement: d0sm02058c1.pdf [file d0sm02058c1.pdf]

**Electronic supplementary information to**

**Long PEO-based nanoribbons generated in a polystyrene matrix  
through reaction-induced microphase separation  
followed by a fast crystallization process**

Jessica Gutiérrez González,<sup>†</sup> Marcos D. Fernández Leyes,<sup>‡</sup> Hernán A. Ritacco,<sup>‡</sup> Walter F.  
Schroeder,<sup>†</sup> and Ileana A. Zucchi<sup>\*†</sup>

<sup>†</sup> Institute of Materials Science and Technology (INTEMA), University of Mar del Plata  
and National Research Council (CONICET), Av. Cristóbal Colón 10850, B7606WV Mar  
del Plata, Argentina

<sup>‡</sup> Departamento de Física, Universidad Nacional del Sur (UNS), Instituto de Física del Sur  
– IFISUR (UNS-CONICET), Bahía Blanca, Argentina

\* Author for correspondence: [izucchi@fi.mdp.edu.ar](mailto:izucchi@fi.mdp.edu.ar) (I.A. Zucchi)

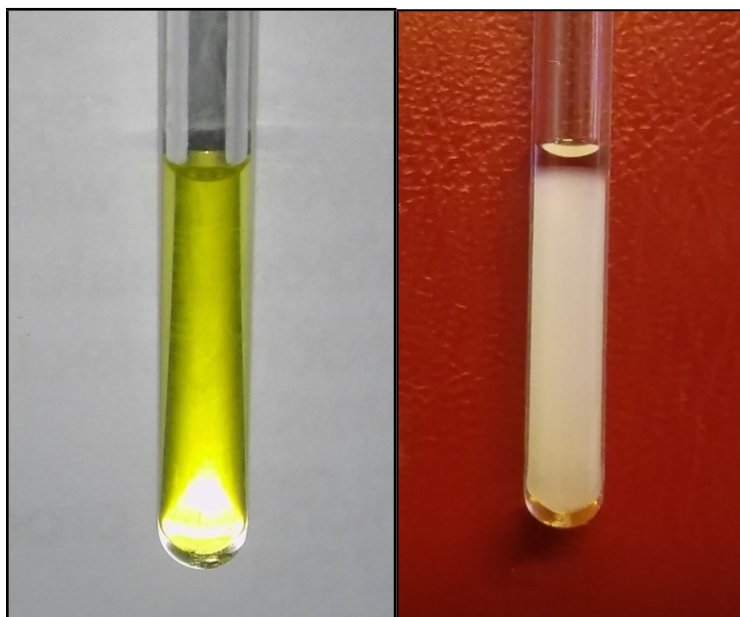

**Fig. S-1.** Photographs taken during the photopolymerization of St in a blend containing 2.55 wt% PEO homopolymer. Left: initially transparent sample (yellow color due to the photoinitiators); right: opacity observed after 2 h of irradiation.

Calculations S-2. Estimated values of  $\phi_1$  as a function of photoirradiation time.

$$\frac{1}{T_m} - \frac{1}{T_m^0} = \frac{R}{\rho_u * V_1 * \Delta H_u} * \phi_1 - \frac{B}{\rho_u * \Delta H_u * T_m} * \phi_1^2 \quad (2)$$

Equation (2) was used to estimate the values of  $\phi_1$  as a function of photoirradiation time by using  $T_m$  (H=0) values of Table 1 and the following parameters:  $\Delta H_u=196.6$  J/g;  $V_1=114.6$  cm<sup>3</sup>/mol;  $\rho_u=1.125$  gr/cm<sup>3</sup>;  $R=8.314$  J/molK;  $T_m^0=336$  K and  $B=6.25$  MPa. Calculations were done using Levenberg-Marquardt algorithm implemented in the Mathcad software package. The obtained results are listed in the following Table:

| <b>Irradiation time (min)</b> | <b>T<sub>m</sub>(H=0), K</b> | <b>φ<sub>1</sub></b> |
|-------------------------------|------------------------------|----------------------|
| 90                            | 293.4                        | 1.703                |
| 180                           | 294.2                        | 1.708                |
| 270                           | 294.8                        | 1.710                |
| 330                           | 295.3                        | 1.714                |

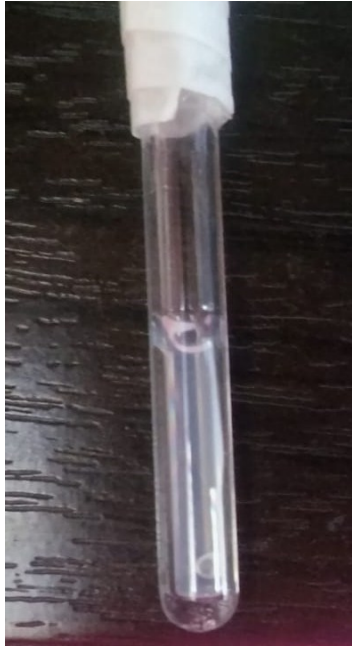

**Fig. S-3.** Photograph of the photocured sample containing 10 wt% BCP.
